# Supplementary material for: Platelets favor the outgrowth of established metastases
Source: PubMed Central journal article supplement (PMC11091169; doi:10.1038/s41467-024-47516-w), 2024-05-13
Supplement: 41467_2024_47516_MOESM3_ESM.pdf [file 41467_2024_47516_MOESM3_ESM.pdf]

## Reporting Summary

Nature Portfolio wishes to improve the reproducibility of the work that we publish. This form provides structure for consistency and transparency in reporting. For further information on Nature Portfolio policies, see our [Editorial Policies](#) and the [Editorial Policy Checklist](#).

### Statistics

For all statistical analyses, confirm that the following items are present in the figure legend, table legend, main text, or Methods section.

n/a Confirmed

- The exact sample size ( $n$ ) for each experimental group/condition, given as a discrete number and unit of measurement
- A statement on whether measurements were taken from distinct samples or whether the same sample was measured repeatedly
- The statistical test(s) used AND whether they are one- or two-sided  
*Only common tests should be described solely by name; describe more complex techniques in the Methods section.*
- A description of all covariates tested
- A description of any assumptions or corrections, such as tests of normality and adjustment for multiple comparisons
- A full description of the statistical parameters including central tendency (e.g. means) or other basic estimates (e.g. regression coefficient) AND variation (e.g. standard deviation) or associated estimates of uncertainty (e.g. confidence intervals)
- For null hypothesis testing, the test statistic (e.g.  $F$ ,  $t$ ,  $r$ ) with confidence intervals, effect sizes, degrees of freedom and  $P$  value noted  
*Give  $P$  values as exact values whenever suitable.*
- For Bayesian analysis, information on the choice of priors and Markov chain Monte Carlo settings
- For hierarchical and complex designs, identification of the appropriate level for tests and full reporting of outcomes
- Estimates of effect sizes (e.g. Cohen's  $d$ , Pearson's  $r$ ), indicating how they were calculated

*Our web collection on [statistics for biologists](#) contains articles on many of the points above.*

### Software and code

Policy information about [availability of computer code](#)

|                 |                                                                                                                                                                                                                                                                                                                                                                                                                                                                                                                                                                                                                                                                  |
|-----------------|------------------------------------------------------------------------------------------------------------------------------------------------------------------------------------------------------------------------------------------------------------------------------------------------------------------------------------------------------------------------------------------------------------------------------------------------------------------------------------------------------------------------------------------------------------------------------------------------------------------------------------------------------------------|
| Data collection | Data were collected using Microsoft Excel 2013 (Windows 10), Graph Pad Prism 5 and 9, IVIS Lumina III and Living Image Software 4.7 (Perkin Elmer), FACS Diva 9.0.1 (BD Biosciences), Scil Vet abc automatic cell counter (Scil Animal Care Company), automatic platelet counter XN-1000 (Sysmex), ATRACT 4004 aggregometer and ATRACT LPC Software (ELITech Group), Phenom-World SEM desktop microscope (Phenom-World B.V.), TEM Hitachi 7500 with a Hamamatsu camera C4742-51-12NR, Leica TCS SP8 laser scan confocal microscope using a 20x/1.0 W-Plan-Apochromat objective (NA 0.75) and a 63xPlan-Apochromat (NA 1.4) and a Leica M205 FA stereomicroscope. |
| Data analysis   | Data were analyzed using Microsoft Excel 2013 (Windows 10), Graph Pad Prism 5 and 9, Living Image Software 4.7 (Perkin Elmer), Matlab 2016, FACS Diva 9.0.1 (BD Biosciences), FlowJo 10 (TreeStar), AMIRA Visage 5.3.3, IMARIS 9.5.1, Adobe Photoshop CS4 and ImageJ 1.53f51 (FIJI).                                                                                                                                                                                                                                                                                                                                                                             |

For manuscripts utilizing custom algorithms or software that are central to the research but not yet described in published literature, software must be made available to editors and reviewers. We strongly encourage code deposition in a community repository (e.g. GitHub). See the Nature Portfolio [guidelines for submitting code & software](#) for further information.

## Data

Policy information about [availability of data](#)

All manuscripts must include a [data availability statement](#). This statement should provide the following information, where applicable:

- Accession codes, unique identifiers, or web links for publicly available datasets
- A description of any restrictions on data availability
- For clinical datasets or third party data, please ensure that the statement adheres to our [policy](#)

All data supporting the findings of this study are available from the corresponding authors on reasonable request. Data generated by FFPE RNA-Seq have been deposited in public databases.

## Research involving human participants, their data, or biological material

Policy information about studies with [human participants or human data](#). See also policy information about [sex, gender \(identity/presentation\), and sexual orientation](#) and [race, ethnicity and racism](#).

|                                                                    |                                                                                                                                                                                                                                                                                                                                                                                                                                                                                                                                                                                                                                                                         |
|--------------------------------------------------------------------|-------------------------------------------------------------------------------------------------------------------------------------------------------------------------------------------------------------------------------------------------------------------------------------------------------------------------------------------------------------------------------------------------------------------------------------------------------------------------------------------------------------------------------------------------------------------------------------------------------------------------------------------------------------------------|
| Reporting on sex and gender                                        | All human specimens derived from women.                                                                                                                                                                                                                                                                                                                                                                                                                                                                                                                                                                                                                                 |
| Reporting on race, ethnicity, or other socially relevant groupings | Unknown                                                                                                                                                                                                                                                                                                                                                                                                                                                                                                                                                                                                                                                                 |
| Population characteristics                                         | Female patients diagnosed with metastatic melanoma. Samples were collected from lung biopsies of metastatic sites.                                                                                                                                                                                                                                                                                                                                                                                                                                                                                                                                                      |
| Recruitment                                                        | The recruitment criteria was metastatic melanoma diagnosis confirmed by anatomic pathology.                                                                                                                                                                                                                                                                                                                                                                                                                                                                                                                                                                             |
| Ethics oversight                                                   | Human studies were performed according to Helsinki declaration and regulations provided by the Ethics Committee from Hospital Gregorio Marañon, Madrid, Spain, Protocol Version 05/Junio 2018. Control human blood samples were obtained from volunteer blood donors who gave written informed consent recruited by the blood transfusion center where the research was performed (Etablissement Français du Sang, Grand-Est). All procedures were registered and approved by the French Ministry of Higher Education and Research. The donors gave their approval in the CODHECO number AC- 2008 - 562 consent form, for the samples to be used for research purposes. |

Note that full information on the approval of the study protocol must also be provided in the manuscript.

## Field-specific reporting

Please select the one below that is the best fit for your research. If you are not sure, read the appropriate sections before making your selection.

Life sciences  Behavioural & social sciences  Ecological, evolutionary & environmental sciences

For a reference copy of the document with all sections, see [nature.com/documents/nr-reporting-summary-flat.pdf](https://www.nature.com/documents/nr-reporting-summary-flat.pdf)

## Life sciences study design

All studies must disclose on these points even when the disclosure is negative.

|                 |                                                                                                                                                                                                                                                                                                                                                                                                                                                                                                                                                                                                                                                                                                                                                                                                                                                                                                                                                                                                   |
|-----------------|---------------------------------------------------------------------------------------------------------------------------------------------------------------------------------------------------------------------------------------------------------------------------------------------------------------------------------------------------------------------------------------------------------------------------------------------------------------------------------------------------------------------------------------------------------------------------------------------------------------------------------------------------------------------------------------------------------------------------------------------------------------------------------------------------------------------------------------------------------------------------------------------------------------------------------------------------------------------------------------------------|
| Sample size     | Sample size was determined by pilot studies that have given statistically significant results and literature search. In the case of mouse experimentation the 3R ethical guidelines were applied after confirmation of low variability between individuals in pilot studies. Sample size for human data were selected based upon the availability of patient biopsies of lung metastatic cancer.                                                                                                                                                                                                                                                                                                                                                                                                                                                                                                                                                                                                  |
| Data exclusions | Less than 5 individual data points within the whole manuscript's datasets were excluded from analysis after their proper statistical identification as outliers using the Grubbs' test, also called the ESD method (extreme studentized deviate), to determine whether the are significant outliers from the rest. Alpha value was set at 0.05.                                                                                                                                                                                                                                                                                                                                                                                                                                                                                                                                                                                                                                                   |
| Replication     | A different number of replicates were done depending on the type of experiment. For in vitro experiment from N=3 to 7 replicates were done, depending on the variability of the results and the relevance of the model (subsequent use at in vivo assays). For consistent results in non-relevant cell lines we established N=3 as a maximum number of triplicates, for the cell models chosen as working models, we went up to N=5, 6 or 7.<br>In the case of in vivo experiment, the number of replicates was reduced but also depending on the type of in vivo model. For zebrafish experiments, we have replicated the assays from N=3 to N=4 depending on the availability of the animal model. For mouse experiments, replicates were diminished up to N=2 according to the 3Rs ethical guidelines, after initial confirmation of low variability between individual results in pilot experiments. Number of replicates of each experiment is indicated in the corresponding figure legend. |
| Randomization   | Animals were randomly allocated into all the experimental groups.                                                                                                                                                                                                                                                                                                                                                                                                                                                                                                                                                                                                                                                                                                                                                                                                                                                                                                                                 |
| Blinding        | Investigators were not blinded during data collection and/or analysis but experiments were performed by two different individuals. Blinding                                                                                                                                                                                                                                                                                                                                                                                                                                                                                                                                                                                                                                                                                                                                                                                                                                                       |

was not recommended in mouse experiments involving thrombocytopenia, as thrombocytopenic subjects needed to be manipulated carefully to avoid premature death during experimentation due to internal bleeding.

## Reporting for specific materials, systems and methods

We require information from authors about some types of materials, experimental systems and methods used in many studies. Here, indicate whether each material, system or method listed is relevant to your study. If you are not sure if a list item applies to your research, read the appropriate section before selecting a response.

### Materials & experimental systems

- n/a  Involved in the study
- Antibodies
- Eukaryotic cell lines
- Palaeontology and archaeology
- Animals and other organisms
- Clinical data
- Dual use research of concern
- Plants

### Methods

- n/a  Involved in the study
- ChIP-seq
- Flow cytometry
- MRI-based neuroimaging

## Antibodies

### Antibodies used

Anti-mouse GPIb, clone RAM.1, in-house produced, Etablissement Francaise du sang (EFS) (Strassel, C. et al. 2006).  
 Anti-mouse GPIb, clone RAM.6, in-house produced, Etablissement Francaise du sang (EFS) (Strassel, C. et al. 2006).  
 Anti-mouse purified NA/LE Rat IgG2a, κ Isotype Control, BD Biosciences, catalog number: 555840.  
 Anti-mouse GPVI Rat (Wistar) IgG2a, clone JAQ.1, Emfret Analytics, Catalog number: M011-0.  
 Anti-human GPVI, Acticorp cession under MTA agreement.  
 Anti-mouse purified GPIb $\alpha$  (CD42b), monoclonal Rat (Wistar) IgG, clone Xia.G7, Emfret Analytics, catalog number: M042-0.  
 Anti-mouse CD45 Biotinylated, clone 30-F11, BioLegend, catalog number: 103104. Company validated plus numerous references.  
 Anti-mouse-Cytokeratin, monoclonal pan (Mixture IgG1, IgG2a), clones C-11 + PCK-26 + CY90 + KS + 1A3 + M20 + A53-B/A2.  
 Anti-firefly Luciferase, polyclonal IgG, Abcam, catalog number ab21176.  
 Anti-mouse purified GPIb $\alpha$  (CD42b), monoclonal Rat (Wistar) IgG, clone Xia.G7, Emfret Analytics, catalog number: M042-0.  
 Anti-rabbit IgG (H+L), highly cross-absorbed polyclonal, Alexa Fluor-555 coupled, Thermo Fisher, catalog number: A-21429.  
 Anti-mouse IgG (H+L), highly cross-absorbed polyclonal, Alexa Fluor-555 coupled, Thermo Fisher, catalog number: A-21424.  
 Anti-mouse CD11b-PerCP/Cy5.5, clone: M1/70, BioLegend  
 Anti-mouse CD11c-BV605, clone: N418, BioLegend  
 Anti-mouse CD170 (SiglecF)-PE, clone: S17007L, BioLegend  
 Anti-mouse CD19-BV711, clone: 6D5, BioLegend  
 Anti-mouse CD25-BV421, clone: A18246A, BioLegend  
 Anti-mouse CD3e-PerCP/Cy5.5, clone: 17A2, BioLegend  
 Anti-mouse CD45-BV510, clone: 30-F11, BioLegend  
 Anti-mouse CD4-AF700, clone: RM4-5, BioLegend  
 Anti-mouse CD8a-BV605, clone: 53-6.7, BioLegend  
 Anti-mouse F4/80-PE/Cy7, clone: BM8, BioLegend  
 Fixable Viability Dye eFluor780, catalogue #65-0865-18, ThermoFisher  
 Anti-mouse I-A/I-E (MHC-II)-AF700, clone: M5/114.15.2, BioLegend  
 Anti-mouse KLRG-PE/Cy7, clone: 2F1/KLRG1, BioLegend  
 Anti-mouse Ly6C-AF488, clone: HK1.4, BioLegend  
 Anti-mouse Ly6G-BV711, clone: 1A8, BioLegend  
 Anti-mouse NKp46-PE, clone:29A1.4, BioLegend  
 Anti-mouse PD-1-PE/Dazzle, clone: 29F.1A12, BioLegend  
 Anti human NG-2 clone: 9.2.27, BD Pharmingen

### Validation

In-house RAM1 anti-mouse platelet GPIb antibody was validated for in vivo use here: Perrault C. et al. 2001. *Thromb. Haemost.*  
 In-house RAM6 anti-mouse platelet GPIb antibody was validated for in vivo use here: Strassel, C. et al. 2006. *Journal of thrombosis and hemostasis*. This antibody is equivalent to the following commercial version used in pilot studies: [https://www.emfret.com/fileadmin/user\\_upload/Datasheets/R300.pdf](https://www.emfret.com/fileadmin/user_upload/Datasheets/R300.pdf)  
 Anti-mouse GPVI, clone JAQ.1 was previously validated for in vivo use here: Nieswandt B. et al. 2018. *J. Exp. Med.*  
 Anti-human GPVI (Glenzocimab) was validated for in vivo use here: Jadoui S. et al. 200–2003. *Haematologica*.  
 Anti-mouse purified NA/LE Rat IgG2a Isotype Control, BD Biosciences was validated for in vivo use by the providing company. <https://www.bdbiosciences.com/eu/reagents/research/antibodies-buffers/immunology-reagents/anti-human-antibodies/cell-surface-antigens/purified-nale-rat-igg2a-isotype-control-r35-95/p/555840>  
 Anti-mouse CD45 Biotinylated, clone 30-F11 has been validated by the providing company and by numerous references <https://www.biolegend.com/fr-fr/products/biotin-anti-mouse-cd45-antibody-98>  
 Anti-mouse Ki-67, clone SP6, has been validated by the providing company and by numerous references. <https://www.thermofisher.com/antibody/product/Ki-67-Antibody-clone-SP6-Recombinant-Monoclonal/MA5-14520>  
 Anti-mouse-Cytokeratin, monoclonal pan (Mixture IgG1, IgG2a), has been validated by the providing company and by numerous references. <http://www.sigmaaldrich.com/catalog/product/sigma/c2562?lang=en&region=US>, and also by first author previous work: Garcia-Leon M.J. et al. 2018. *Development*.

Anti-firefly Luciferase has been validated by the providing company and by numerous references. <http://www.abcam.com/firefly-luciferase-antibody-ab21176.html>

Anti-mouse purified GPIb $\alpha$  (CD42b), clone Xia.G7 was validated by the providing company for the detection of platelets by flow cytometry and by pilot studies on tissue OCT and paraffin slides. <https://fnkprddata.blob.core.windows.net/domestic/data/datasheet/EMF/M042-1.pdf>

Anti NG-2 antibody has been advanced validated by the providing company <https://www.thermofisher.com/antibody/product/Neural-Glial-Antigen-2-NG2-Antibody-clone-9-2-27-Monoclonal/14-6504-82>

All immunofluorescence antibodies were further validated in the laboratory using negative staining controls.

CD11b-PerCP/Cy5.5 clone M1/70 was validated by the company and it is referenced in 201 publications <https://www.biolegend.com/en-us/products/purified-anti-mouse-human-cd11b-antibody-351>

CD11c-BV605 clone N418 was validated by the company and it is referenced in 135 publications <https://www.biolegend.com/en-us/products/purified-anti-mouse-cd11c-antibody-1817>

CD170 (SiglecF)-PE clone S17007L was validated by the company and it is referenced in 2 publications <https://www.biolegend.com/en-us/products/purified-anti-mouse-cd170-siglec-f-antibody-16369>

CD19-BV711 clone 6D5 was validated by the company and it is referenced in 61 publications <https://www.biolegend.com/en-us/products/purified-anti-mouse-cd19-antibody-1532>

CD25-BV421 clone A18246A was validated by the company <https://www.biolegend.com/en-us/products/purified-anti-mouse-cd25-antibody-22049>

CD3e-PerCP/Cy5.5. clone 17A2 was validated by the company and it is referenced in 111 publications <https://www.biolegend.com/en-us/products/purified-anti-mouse-cd3-antibody-48>

CD4-AF700 clone RM4-5 was validated by the company and it is referenced in 46 publications <https://www.biolegend.com/en-us/products/alexa-fluor-700-anti-mouse-cd4-antibody-3386>

CD8a-BV605 clone 53-6.7 was validated by the company and it is referenced in 74 publications <https://www.biolegend.com/en-us/products/brilliant-violet-605-anti-mouse-cd8a-antibody-7636>

F4/80-PE/Cy7 clone BM8 was validated by the company and it is referenced in 206 publications <https://www.biolegend.com/en-us/products/pe-cyanine7-anti-mouse-f4-80-antibody-4070>

I-A/I-E (MHC-II)-AF700 clone M5/114.15.2 was validated by the company and it is referenced in 106 publications <https://www.biolegend.com/en-us/products/alexa-fluor-700-anti-mouse-i-a-i-e-antibody-3413>

KLRG-PE/Cy7 clone 2F1/KLRG1 was validated by the company and it is referenced in 31 publications <https://www.biolegend.com/en-us/products/pe-cyanine7-anti-mouse-human-klrg1-mafa-antibody-8312>

Ly6C-AF488 clone HK1.4 was validated by the company and it is referenced in 42 publications <https://www.biolegend.com/en-us/products/alexa-fluor-488-anti-mouse-ly-6c-antibody-6756>

Ly6G-BV711 clone 1A8 was validated by the company and it is referenced in 14 publications <https://www.biolegend.com/en-us/products/brilliant-violet-711-anti-mouse-ly-6g-antibody-12062>

NKp46-PE clone 29A1.4 was validated by the company and it is referenced in 30 publications <https://www.biolegend.com/en-us/products/pe-anti-mouse-cd335-nkp46-antibody-6523>

PD-1-PE/Dazzle clone 29F.1A12 was validated by the company and it is referenced in 8 publications <https://www.biolegend.com/en-us/products/pe-dazzle-594-anti-mouse-cd279-pd-1-antibody-12090>

All flow-cytometry antibodies were also internally validated by negative staining and single stainings.

Secondary antibodies are routinely used in the lab for many applications and validated by the provider (Thermo Fisher)

## Eukaryotic cell lines

Policy information about [cell lines and Sex and Gender in Research](#)

|                                                                   |                                                                                                                                                                                                                                                                                                                                                                                                                                                                                                                                                                                                                                                                                                                                                                                                                                                                                                                                                                                                                                                                                                                                                                                                                                                                                                                                                                                                      |
|-------------------------------------------------------------------|------------------------------------------------------------------------------------------------------------------------------------------------------------------------------------------------------------------------------------------------------------------------------------------------------------------------------------------------------------------------------------------------------------------------------------------------------------------------------------------------------------------------------------------------------------------------------------------------------------------------------------------------------------------------------------------------------------------------------------------------------------------------------------------------------------------------------------------------------------------------------------------------------------------------------------------------------------------------------------------------------------------------------------------------------------------------------------------------------------------------------------------------------------------------------------------------------------------------------------------------------------------------------------------------------------------------------------------------------------------------------------------------------|
| Cell line source(s)                                               | B16F10 cells were purchased at Perkin Elmer. MDA-MB-231 and MCF7 cell lines were purchased from ATCC. E0771 cells were purchased from Ch3 biosystems. AT3 were a kind gift from Abrams S.I. Lab: Stewart T.J. 2007. J. Immunol. 4T1 cells were a kind gift from Corine Laplace-Builhé (Institut Gustave Roussy). D2A1 were a kind gift from Bob Weinberg lab. Finally, A375 cells were gifted by Guillaume Montagnac.                                                                                                                                                                                                                                                                                                                                                                                                                                                                                                                                                                                                                                                                                                                                                                                                                                                                                                                                                                                |
| Authentication                                                    | Consistency in cell line phenotypes was ensured in all cases by the application of the seed-loot system for cell banking, where master and working stocks were generated from an initial (commercial, or not) vial. Experiments were performed with low-passage working stock vials.<br>B16F10 cell line was authenticated by the provider company (Perkin Elmer). We validated their epithelial phenotype by expression and secretion to the culture media of melanin and their non-epithelial phenotype by staining with anti-pan-cytokeratin antibody (negative). Proper doubling time was also studied according to ATCC cell line description.<br>4T1 cells were previously used in Ghoroghi S. et al. 2021. eLife, and many other papers from the lab. They are also a well-established model of breast cancer metastasis in the literature. We validated their epithelial phenotype by immunostaining with pan-cytokeratin. Their exponential growth in Balb/c mice confirmed their genetic background. Proper doubling time was also studied as indicated at ATCC cell line description.<br>E0771 cell line was authenticated by the provider company (Ch3 biosystems). Proper doubling time was studied according to the company's cell line description.<br>The rest of the cell lines, used only for in vitro tests, were validated by assessing doubling time and mycoplasma negativity. |
| Mycoplasma contamination                                          | All cell lines used were mycoplasma negative. Tested with the Venor GeMOneStep Mycoplasma detection kit, Thermo Fisher.                                                                                                                                                                                                                                                                                                                                                                                                                                                                                                                                                                                                                                                                                                                                                                                                                                                                                                                                                                                                                                                                                                                                                                                                                                                                              |
| Commonly misidentified lines (See <a href="#">ICLAC</a> register) | Non commonly misidentified cell lines were used in this study.                                                                                                                                                                                                                                                                                                                                                                                                                                                                                                                                                                                                                                                                                                                                                                                                                                                                                                                                                                                                                                                                                                                                                                                                                                                                                                                                       |

## Animals and other research organisms

Policy information about [studies involving animals](#); [ARRIVE guidelines](#) recommended for reporting animal research, and [Sex and Gender in Research](#)

|                         |                                                                                                                                                                                                                                                                                                                                                                                                                                                                                                                                                                                                                                                                 |
|-------------------------|-----------------------------------------------------------------------------------------------------------------------------------------------------------------------------------------------------------------------------------------------------------------------------------------------------------------------------------------------------------------------------------------------------------------------------------------------------------------------------------------------------------------------------------------------------------------------------------------------------------------------------------------------------------------|
| Laboratory animals      | Mouse ( <i>mus musculus</i> ), BALB/c or C57BL/6 from 8 to 12 weeks old from Charles Rivers laboratories, and C5BL/6 GPVI-deficient mice and hGPVI transgenic mice were generated and bred in-house at the Establishment Francais du Sang, Alsace (EFS) (Mangin P. H. et al. 2012. The journal of pharmacology and experimental therapeutics). Tg(fli1a:eGFP) Zebrafish ( <i>Danio rerio</i> ) embryos from a Tübingen background were kindly provided by the group of F. Peri from EMBL (Heidelberg, Germany) and further grown and bred in our in-house Zebrafish facility. Embryos were maintained as previously described (Goetz et al., 2014 Cell Reports) |
| Wild animals            | N/A                                                                                                                                                                                                                                                                                                                                                                                                                                                                                                                                                                                                                                                             |
| Reporting on sex        | For breast cancer modeling only females were used. Otherwise male and females were used in equivalent proportions.                                                                                                                                                                                                                                                                                                                                                                                                                                                                                                                                              |
| Field-collected samples | N/A                                                                                                                                                                                                                                                                                                                                                                                                                                                                                                                                                                                                                                                             |
| Ethics oversight        | Immunocompetent and genetically-modified mice used in this study were housed under pathogen-free conditions and all procedures were performed in accordance with the European Union Guideline 2010/63/EU. The study was approved by the Regional Ethical Committee for Animal Experimentation of Strasbourg, CREMEAS (CEEA 35) and registered under the APAFIS authorization 14741-2018041816337540 and 37433-2022052016445806                                                                                                                                                                                                                                  |

Note that full information on the approval of the study protocol must also be provided in the manuscript.

## Plants

|                       |     |
|-----------------------|-----|
| Seed stocks           | N/A |
| Novel plant genotypes | N/A |
| Authentication        | N/A |

## Flow Cytometry

### Plots

Confirm that:

- The axis labels state the marker and fluorochrome used (e.g. CD4-FITC).
- The axis scales are clearly visible. Include numbers along axes only for bottom left plot of group (a 'group' is an analysis of identical markers).
- All plots are contour plots with outliers or pseudocolor plots.
- A numerical value for number of cells or percentage (with statistics) is provided.

### Methodology

|                           |                                                                                                                                                                                                                                                                                                                                                                                                                                                                                                                                                                                                                              |
|---------------------------|------------------------------------------------------------------------------------------------------------------------------------------------------------------------------------------------------------------------------------------------------------------------------------------------------------------------------------------------------------------------------------------------------------------------------------------------------------------------------------------------------------------------------------------------------------------------------------------------------------------------------|
| Sample preparation        | Mouse whole blood was collected and as detailed in Material and Methods. Platelets in whole blood were stained with an anti-platelet antibody in-house made (and referenced in Methods) directly coupled with alexa-647. For ex-vivo flow cytometry, lung left lobes were cut and dissociated enzymatically according to the protocol stated in Material and Methods section. Antibodies used are listed in Table S1.                                                                                                                                                                                                        |
| Instrument                | BD LSRFortessa™ X-20 Cell Analyzer and Attune NxT (Invitrogen)                                                                                                                                                                                                                                                                                                                                                                                                                                                                                                                                                               |
| Software                  | Acquisition software used was the BD FACS Diva 9.0.1; analysis was done on FlowJo V10.                                                                                                                                                                                                                                                                                                                                                                                                                                                                                                                                       |
| Cell population abundance | No sorting was applied in the present study.                                                                                                                                                                                                                                                                                                                                                                                                                                                                                                                                                                                 |
| Gating strategy           | FACS analysis was performed in PBS-diluted mouse whole blood. FSC-A/SSC-W were used to discern platelets from background and big mononuclear cells. To separate platelet signal from erythrocytes, we stained with the platelet-specific antibody anti-GPIb (RAM1), directly labeled with alexa-647 and did an electronic gating on GPIb+ events. In the resulting gate, the expression of the marker in study (GPVI) was analysed. For ex-vivo lung immunophenotyping, FSC-A/SSC-A were used to gate the total cell population, further restricted to single cells events (FSC-A vs FSC-W) and to viable cells (negative at |

10<sup>4</sup> for viability marker). Subpopulations gatings were sequentially within the CD45-expressing cell populations, according to the gating strategy in supplementary information (S7).

Tick this box to confirm that a figure exemplifying the gating strategy is provided in the Supplementary Information.
